# Supplementary material for: In situ growth behavior of boron nitride nanotubes on the surface of silicon carbide fibers as hierarchical reinforcements
Source: Royal Society of Chemistry journal article supplement (doi:10.1039/c5ra23318f), 2016-01-01
Supplement: c5ra23318f1.pdf [file c5ra23318f1.pdf]

## In situ growth behavior of boron nitride nanotubes on the surface of silicon carbide fibers as hierarchical reinforcements

### Supplementary Information

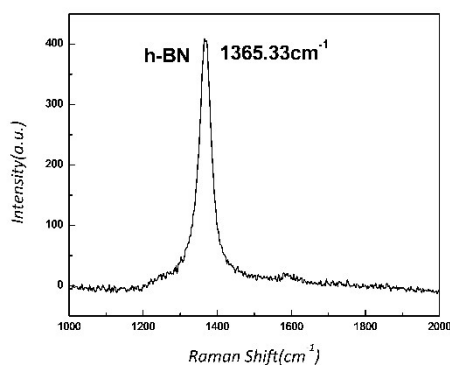

Fig. S1 Raman spectra of the as-grown BNNTs.

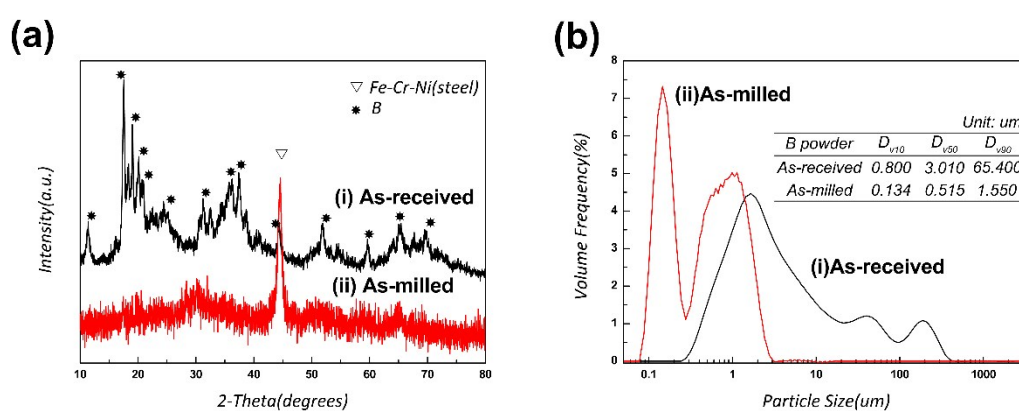

Fig. S2 (a) The XRD patterns and (b) particle size distribution of as-received and as-milled boron powder. The table inserted in the right figure presents D<sub>v10</sub>, D<sub>v50</sub> and D<sub>v90</sub> values of as-received and as-milled boron powder.
